# Supplementary material for: Diagnostic pathways and management in women with pregnancy-associated breast cancer (PABC): no evidence of treatment delays following a first healthcare contact
Source: Springer Nature journal article supplement (doi:10.1007/s10549-018-05083-x), 2018-12-14

**SUPPLEMENTAL MATERIAL**

**Supplemental Table 1. Sampling and retrieval rate of medical records in eligible women diagnosed with PABC and non-PABC 1992-2009 in 11 hospitals included.**

| Hospital                                        | Eligible<br>PABC<br>1992-2009<br>N | Eligible<br>nonPABC<br>1992-2009<br>N | Sampled<br>PABC<br>N | Sampled<br>nonPABC<br>(matched)<br>N | Retrieval<br>rate <sup>1</sup> of<br>PABC<br>% |
|-------------------------------------------------|------------------------------------|---------------------------------------|----------------------|--------------------------------------|------------------------------------------------|
| Retrieved from register data<br>(n=9,441)       | <b>778</b>                         | <b>8,663</b>                          |                      |                                      |                                                |
| Retrieval of medical records:                   |                                    |                                       |                      |                                      |                                                |
| <b>Non-included hospitals</b>                   | <b>442</b>                         | <b>5,602</b>                          |                      |                                      |                                                |
| <b>Included hospitals</b>                       | <b>336</b>                         | <b>3,061</b>                          | <b>273</b>           | <b>273</b>                           | <b>81.3</b>                                    |
| Capio S:t Görans Hospital<br>(Stockholm)        | 43                                 | 443                                   | 4                    | 4                                    | 9.3                                            |
| Stockholm South General Hospital<br>(Stockholm) | 48                                 | 330                                   | 38                   | 38                                   | 79.2                                           |
| Karolinska University Hospital<br>(Stockholm)   | 34                                 | 376                                   | 33                   | 33                                   | 97.1                                           |
| Danderyd Hospital (Stockholm)                   | 37                                 | 275                                   | 36                   | 36                                   | 97.3                                           |
| Uppsala University Hospital<br>(Uppsala)        | 20                                 | 186                                   | 20                   | 20                                   | 100.0                                          |
| Linköping University Hospital<br>(Linköping)    | 22                                 | 177                                   | 20                   | 20                                   | 90.9                                           |
| Kristianstad Central Hospital<br>(Kristianstad) | 13                                 | 130                                   | 11                   | 11                                   | 84.6                                           |
| Skåne University Hospital (Malmö)               | 24                                 | 241                                   | 24                   | 24                                   | 100.0                                          |
| Skåne University Hospital (Lund)                | 21                                 | 273                                   | 20                   | 20                                   | 95.2                                           |
| Sahlgrenska University Hospital<br>(Göteborg)   | 37                                 | 364                                   | 33                   | 33                                   | 89.2                                           |
| Sahlgrenska University Hospital<br>(Mölnadal)   | 37                                 | 266                                   | 34                   | 34                                   | 91.9                                           |

<sup>1</sup> Retrieval rate among PABC: 273/336=0.813. Retrieval rate=sampled PABC/eligible PABC

**Supplemental Table 2. Timing of symptoms, contact, examination and surgery in relation to during pregnancy or during lactation by pregnancy-association at diagnosis.**

| Timing of diagnosis                        | Pregnancy and 0-24 mo postpartum |                    | Pregnancy | 0-6mo | 6-12mo | 12-24mo |
|--------------------------------------------|----------------------------------|--------------------|-----------|-------|--------|---------|
|                                            | PABC                             | Non-PABC (matched) | PABC      | PABC  | PABC   | PABC    |
|                                            | N                                | N                  | N         | N     | N      | N       |
| <b>Timing of symptoms</b>                  |                                  |                    |           |       |        |         |
| Non-PABC                                   | 0                                | 229                | 0         | 0     | 0      | 0       |
| Symptoms during pregnancy                  | 61                               | 2                  | 38        | 13    | 7      | 3       |
| Symptoms during lactation                  | 50                               | 0                  | 0         | 14    | 26     | 10      |
| Symptoms after lactation                   | 120                              | 0                  | 0         | 2     | 24**   | 94      |
| Unknown timing of symptoms <sup>1</sup>    | 42                               | 42                 | 3         | 1     | 7      | 31      |
| <b>Timing of contact</b>                   |                                  |                    |           |       |        |         |
| Non-PABC                                   | 0                                | 234                | 0         | 0     | 0      | 0       |
| Contact during pregnancy                   | 47                               | 2                  | 40        | 2     | 3      | 2       |
| Contact during lactation                   | 55                               | 0                  | 0         | 25    | 24     | 6       |
| Contact after lactation                    | 134                              | 0                  | 0         | 3     | 32     | 99      |
| Unknown timing of contact <sup>1</sup>     | 37                               | 37                 | 1         | 0     | 5      | 31      |
| <b>Timing of examination</b>               |                                  |                    |           |       |        |         |
| Non-PABC                                   | 0                                | 228                | 0         | 0     | 0      | 0       |
| Examination during pregnancy               | 45                               | 1                  | 40        | 1     | 1      | 2       |
| Examination during lactation               | 50                               | 0                  | 0         | 23    | 22     | 5       |
| Examination after lactation                | 135                              | 0                  | 0         | 5     | 36     | 94      |
| Unknown timing of examination <sup>1</sup> | 88                               | 44                 | 1         | 1     | 5      | 37      |
| <b>Timing of surgery</b>                   |                                  |                    |           |       |        |         |
| Non-PABC                                   | 0                                | 214                | 0         | 0     | 0      | 0       |
| Surgery during pregnancy                   | 26                               | 1                  | 24        | 0     | 0      | 1       |
| Surgery during lactation                   | 13                               | 0                  | 2         | 4     | 7      | 0       |
| Surgery after lactation                    | 176                              | 0                  | 9         | 21    | 46     | 100     |
| Unknown timing of surgery <sup>1</sup>     | 117                              | 58                 | 6         | 5     | 11     | 37      |

<sup>1</sup> Unknown includes PABC with unknown timing, and their matched non-PABC controls.

**Supplemental Figure 1.** Definition of waiting times (A, B, C, D)

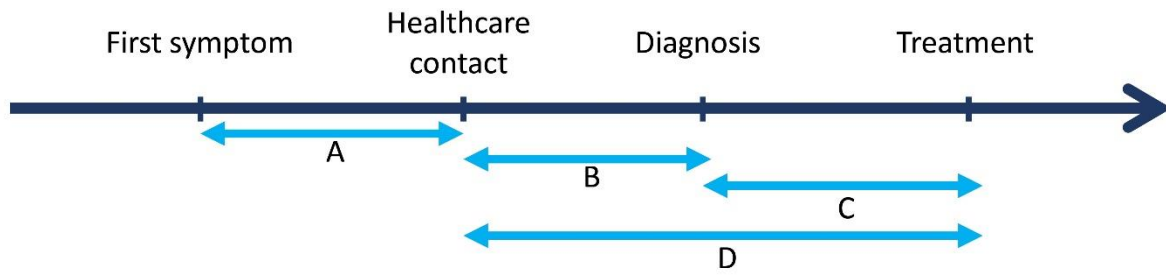

Supplement: MOESM1 [file 16343230]
